# Supplementary material
Source: publisher figshare collection journal article supplement (https://acs.figshare.com/ndownloader/files/9885556)
Supplement: Supplementary file 1 [file 9885556]

	AMPA	KA	NMDA	GluK1	GluK2	GluK3
	IC50 (µM)	IC50 (µM)	Ki (µM)	Ki (µM)	Ki (µM)	Ki (µM)	SMILES
1a	51	22	6	4.3	>100	8.1	O=C([C@H]1NCC[C@@H]1C2=CC=CC(C(O)=O)=C2)O
1b	2	1.4	1	4.8	10-100	0.87	O=C([C@H]1NCC[C@@H]1C2=CC=C(O)C(C(O)=O)=C2)O
1c	>100	>100	>100	126	>1000	78	O=C([C@H]1NCC[C@@H]1C2=CC=CC(P(O)(O)=O)=C2)O
1d	>100	>100	>100	>100	>100	>100	ClC1=CC([C@@H]2[C@@H](C(O)=O)NCC2)=CC=C1
1e	>100	>100	>100	>100	>100	>100	O=C([C@H]1NCC[C@@H]1C2=CC=CC(C(F)(F)F)=C2)O
1f	>100	>100	>100	--	--	--	NC1=CC([C@@H]2[C@@H](C(O)=O)NCC2)=CC=C1
1g	>100	>100	>100	>1000	>1000	>1000	O=C([C@H]1NCC[C@@H]1C2=CC=CC(C#N)=C2)O
1h	>100	>100	>100	>100	>100	>100	O=C([C@H]1NCC[C@@H]1C2=CC=CC(C(N)=O)=C2)O
1i	>100	>100	>100	>1000	>1000	>100	O=C([C@H]1NCC[C@@H]1C2=CC=CC(B(O)O)=C2)O
1j	>100	>100	35	--	--	--	OC1=CC([C@@H]2[C@@H](C(O)=O)NCC2)=CC=C1O
1k	> 100	59	4.6	12	>100	11	O=C([C@H]1NCC[C@@H]1C2=CC=C(F)C(C(O)=O)=C2)O
1l	>100	>100	0.63	154	>100	131	O=C([C@H]1NCC[C@@H]1C2=CC=C(Cl)C(C(O)=O)=C2)O
1m	>100	>100	17	>100	>100	>100	O=C([C@H]1NCC[C@@H]1C2=CC=C(C)C(C(O)=O)=C2)O
1n	>100	>100	0.62	> 100	> 100	> 100	O=C([C@H]1NCC[C@@H]1C2=CC=C(Br)C(C(O)=O)=C2)O
